# Supplementary material for: Investigating molecular crowding within nuclear pores using polarization-PALM
Source: PubMed Central journal article supplement (PMC5693140; doi:10.7554/elife.28716), 2017-09-26
Supplement: elife-28716-supp1.pdf [file elife-28716-supp1.pdf]

**Table S1:  $\langle p \rangle_{\text{cir}}$  and  $\langle p^2 \rangle_{\text{cir}}$  Values<sup>a</sup>**

| Sample                                                | $\langle p \rangle_{\text{cir}} \pm SD$ | $\langle p^2 \rangle_{\text{cir}} \pm SD$ | $N_{\text{photons}}$ | $N$   |
|-------------------------------------------------------|-----------------------------------------|-------------------------------------------|----------------------|-------|
| <b><i>Pom121-mEos3:</i></b>                           |                                         |                                           |                      |       |
| Wildtype                                              | 0.014 ± 0.010                           | 0.042 ± 0.016                             | 376                  | 3464  |
| + 10 µM Imp β1                                        | 0.022 ± 0.008                           | 0.062 ± 0.017                             | 349                  | 2197  |
| + 10 µM Imp β2                                        | 0.021 ± 0.010                           | 0.052 ± 0.006                             | 348                  | 2622  |
| + 1 mg/mL WGA                                         | 0.024 ± 0.019                           | 0.17 ± 0.03                               | 372                  | 5374  |
| + 10% Hexanediol                                      | 0.043 ± 0.015                           | 0.062 ± 0.01                              | 460                  | 1679  |
| <b><i>mEos3-Pom121:</i></b>                           |                                         |                                           |                      |       |
| Wildtype                                              | 0.021 ± 0.015                           | 0.060 ± 0.019                             | 372                  | 3561  |
| + 10 µM Imp β1                                        | 0.021 ± 0.017                           | 0.066 ± 0.013                             | 371                  | 2036  |
| + 10 µM Imp β2                                        | 0.023 ± 0.013                           | 0.077 ± 0.014                             | 339                  | 2240  |
| + 1 mg/mL WGA                                         | 0.037 ± 0.011                           | 0.11 ± 0.01                               | 375                  | 2121  |
| <b><i>Nup153-mEos3:</i></b>                           |                                         |                                           |                      |       |
| Wildtype                                              | 0.002 ± 0.004                           | 0.037 ± 0.006                             | 332                  | 2526  |
| + 10 µM Imp β1                                        | 0.017 ± 0.003                           | 0.044 ± 0.012                             | 359                  | 2876  |
| + 10 µM Imp β2                                        | 0.016 ± 0.008                           | 0.058 ± 0.010                             | 338                  | 2548  |
| + 1 mg/mL WGA                                         | 0.042 ± 0.018                           | 0.13 ± 0.04                               | 356                  | 2210  |
| <b><i>mEos3-Nup153:</i></b>                           |                                         |                                           |                      |       |
| Wildtype                                              | 0.019 ± 0.009                           | 0.052 ± 0.010                             | 371                  | 3689  |
| + 10 µM Imp β1                                        | 0.016 ± 0.015                           | 0.061 ± 0.013                             | 357                  | 2634  |
| + 10 µM Imp β2                                        | 0.026 ± 0.013                           | 0.087 ± 0.018                             | 353                  | 2022  |
| + 1 mg/mL WGA                                         | 0.020 ± 0.023                           | 0.13 ± 0.01                               | 380                  | 3074  |
| <b><i>RanGAP-mEos3:</i></b>                           |                                         |                                           |                      |       |
| Wildtype                                              | -0.009 ± 0.006                          | 0.056 ± 0.020                             | 351                  | 3010  |
| + 10 µM Imp β1                                        | 0.002 ± 0.011                           | 0.059 ± 0.028                             | 356                  | 2178  |
| + 10 µM Imp β2                                        | 0.002 ± 0.009                           | 0.12 ± 0.01                               | 334                  | 2410  |
| + 1 mg/mL WGA                                         | 0.045 ± 0.005                           | 0.20 ± 0.02                               | 356                  | 3040  |
| + 4% Formaldehyde                                     | 0.087 ± 0.019                           | 0.27 ± 0.03                               | 322                  | 2548  |
| <b><i>mEos3-Nup98:</i></b>                            |                                         |                                           |                      |       |
| Wildtype                                              | 0.015 ± 0.007                           | 0.037 ± 0.010                             | 411                  | 2243  |
| + 10 µM Imp β1                                        | 0.014 ± 0.012                           | 0.048 ± 0.014                             | 337                  | 2181  |
| + 10 µM Imp β2                                        | 0.019 ± 0.008                           | 0.044 ± 0.004                             | 365                  | 2051  |
| + 1 mg/mL WGA                                         | 0.060 ± 0.011                           | 0.19 ± 0.02                               | 363                  | 2739  |
| <b><i>mEos3:</i></b>                                  |                                         |                                           |                      |       |
| In 92% glycerol (all points) <sup>b</sup>             | 0.007 ± 0.001                           | 0.034 ± 0.002                             | 314                  | 38380 |
| In 92% glycerol (2 <sup>nd</sup> points) <sup>c</sup> | 0.007 ± 0.005                           | 0.027 ± 0.008                             | 378                  | 458   |
| Adsorbed on a coverslip <sup>d</sup>                  | 0.12 ± 0.014                            | 0.28 ± 0.01                               | 342                  | 2604  |

***mEos3-Nup98 Middle Mutants<sup>e</sup>:***

|            |               |               |     |      |
|------------|---------------|---------------|-----|------|
| N-terminus | 0.015 ± 0.007 | 0.037 ± 0.010 | 411 | 2243 |
| 110mid     | 0.013 ± 0.003 | 0.056 ± 0.012 | 397 | 3730 |
| 400mid     | 0.012 ± 0.007 | 0.039 ± 0.003 | 397 | 2525 |
| 500mid     | 0.039 ± 0.011 | 0.082 ± 0.007 | 366 | 3131 |
| 700mid     | 0.012 ± 0.016 | 0.12 ± 0.02   | 351 | 2841 |

***mEos3-Nup98 Middle Mutants<sup>e</sup> (+ 10 μM Imp β1):***

|            |               |               |     |      |
|------------|---------------|---------------|-----|------|
| N-terminus | 0.014 ± 0.012 | 0.048 ± 0.014 | 337 | 2181 |
| 110mid     | 0.018 ± 0.005 | 0.044 ± 0.012 | 358 | 2412 |
| 400mid     | 0.019 ± 0.001 | 0.052 ± 0.006 | 357 | 2769 |
| 500mid     | 0.019 ± 0.009 | 0.073 ± 0.021 | 357 | 2577 |
| 700mid     | 0.027 ± 0.006 | 0.11 ± 0.02   | 353 | 2243 |

***mEos3-Nup98 Middle Mutants<sup>e</sup> (+ 1 mg/mL WGA):***

|            |               |             |     |      |
|------------|---------------|-------------|-----|------|
| N-terminus | 0.060 ± 0.011 | 0.19 ± 0.02 | 363 | 2739 |
| 110mid     | 0.040 ± 0.013 | 0.24 ± 0.02 | 367 | 4563 |
| 400mid     | 0.047 ± 0.018 | 0.29 ± 0.04 | 329 | 3107 |
| 500mid     | 0.053 ± 0.014 | 0.21 ± 0.02 | 382 | 2617 |
| 700mid     | 0.033 ± 0.024 | 0.18 ± 0.04 | 371 | 2391 |

***mEos3-Nup98 Tip Mutants<sup>e</sup>:***

|                      |                |               |     |      |
|----------------------|----------------|---------------|-----|------|
| N-terminus           | 0.015 ± 0.007  | 0.037 ± 0.010 | 411 | 2243 |
| 110tip               | -0.006 ± 0.014 | 0.034 ± 0.014 | 401 | 1789 |
| 110tip + 1 mg/mL WGA | 0.027 ± 0.028  | 0.19 ± 0.009  | 459 | 1220 |
| 400tip               | -0.002 ± 0.006 | 0.031 ± 0.007 | 382 | 2212 |

***mEos2-Nup98:***

|          |               |               |     |      |
|----------|---------------|---------------|-----|------|
| Wildtype | 0.004 ± 0.012 | 0.097 ± 0.011 | 353 | 3660 |
|----------|---------------|---------------|-----|------|

<sup>a</sup>*N* individual measurements were pooled into 4 datasets of equal size. The standard deviation (*SD*) was calculated from the 4 independently determined average values. *SDs* were carried to the same decimal value as the mean, which was assumed to be accurate to 2 significant figures, or the nearest thousandth. The mean ± *SD* approximately represents the 85% confidence interval (see Figure 2 – Supplement 6). The effect of the average number of photons collected ( $N_{photons}$ ) on  $\langle p \rangle_{cir}$  and  $\text{Var}(p)_{cir}$  values is illustrated in Figure 2 – Supplement 5. Theoretically, for circular excitation,  $\langle p^2 \rangle_{cir} = \text{Var}(p)_{cir}$  since  $\langle p \rangle_{cir} = 0$  (see Methods), which was approximately true in most cases.

<sup>b</sup>Data collected by using intensities from all points in the trajectories for every spot observed. Most trajectories were observed as a single spot.

<sup>c</sup>Data collected by using intensities from the second point in the trajectory for trajectories consisting of at least three frames. This approach eliminates the possibility of photoactivation or photobleaching during data acquisition, and was used for all p-PALM data (unless otherwise indicated). Due to translational diffusion, trajectories with  $\geq 3$  points were rare occurrences in 92% glycerol.

<sup>d</sup>Coverslip adsorbed mEos3 yielded results inconsistent with isotropic orientations, likely due to non-random adsorbed orientations and bias (due to flow or coverslip defects). Nonetheless, p-PALM measurements indicate low rotational mobility.

<sup>e</sup>Nup98 middle mutants were generated by inserting mEos3 at the indicated amino acid position from the N-terminus. Tip mutants were generated by deleting the indicated number of amino acids from the N-terminus and then attaching mEos3 (see Figure 1 – Supplement 2).

**Table S2:  $\langle p \rangle_{\text{lin}}$  and  $\text{Var}(p)_{\text{lin}}$  Values<sup>a</sup>**

| Sample                                                | $\langle p \rangle_{\text{lin}} \pm SD$ | $\text{Var}(p)_{\text{lin}} \pm SD$ | $N_{\text{photons}}$ | $N$   |
|-------------------------------------------------------|-----------------------------------------|-------------------------------------|----------------------|-------|
| <b><i>Pom121-mEos3:</i></b>                           |                                         |                                     |                      |       |
| Wildtype                                              | 0.42 ± 0.03                             | 0.024 ± 0.044                       | 394                  | 558   |
| + 10 µM Imp β1                                        | 0.45 ± 0.01                             | 0.028 ± 0.024                       | 298                  | 855   |
| + 1 mg/mL WGA                                         | 0.42 ± 0.08                             | 0.074 ± 0.115                       | 395                  | 922   |
| 10% Hexanediol                                        | 0.45 ± 0.02                             | 0.0375 ± 0.030                      | 392                  | 325   |
| <b><i>Nup153-mEos3:</i></b>                           |                                         |                                     |                      |       |
| Wildtype                                              | 0.41 ± 0.01                             | 0.012 ± 0.017                       | 469                  | 757   |
| <b><i>mEos3-Nup153:</i></b>                           |                                         |                                     |                      |       |
| Wildtype                                              | 0.46 ± 0.01                             | 0.018 ± 0.017                       | 305                  | 959   |
| <b><i>mEos3:</i></b>                                  |                                         |                                     |                      |       |
| In 92% glycerol (all points) <sup>b</sup>             | 0.50 ± 0.01                             | 0.030 ± 0.017                       | 240                  | 16720 |
| In 92% glycerol (2 <sup>nd</sup> points) <sup>c</sup> | 0.47 ± 0.01                             | 0.019 ± 0.017                       | 306                  | 246   |
| Adsorbed on a coverslip <sup>d</sup>                  | 0.44 ± 0.02                             | 0.12 ± 0.04                         | 390                  | 844   |
| <b><i>mEos3-Nup98 Middle Mutants<sup>e</sup>:</i></b> |                                         |                                     |                      |       |
| N-terminus                                            | 0.41 ± 0.02                             | 0.022 ± 0.030                       | 371                  | 1100  |
| 110mid                                                | 0.43 ± 0.02                             | 0.025 ± 0.030                       | 272                  | 675   |
| 400mid                                                | 0.44 ± 0.02                             | 0.016 ± 0.030                       | 413                  | 296   |
| 500mid                                                | 0.44 ± 0.05                             | 0.036 ± 0.077                       | 415                  | 454   |
| 700mid                                                | 0.42 ± 0.02                             | 0.024 ± 0.035                       | 384                  | 1010  |
| <b><i>mEos3-Nup98 Tip Mutants<sup>e</sup>:</i></b>    |                                         |                                     |                      |       |
| N-terminus                                            | 0.41 ± 0.02                             | 0.022 ± 0.030                       | 371                  | 1100  |
| 110tip                                                | 0.42 ± 0.03                             | 0.014 ± 0.044                       | 313                  | 565   |

<sup>a</sup> $N$  individual measurements were pooled into 4 datasets of equal size. The standard deviation ( $SD$ ) was calculated from the 4 independently determined average values.  $SD$ s were carried to the same decimal value as the mean, which was assumed to be accurate to 2 significant figures, or the nearest thousandth. The mean  $\pm SD$  approximately represents the 85% confidence interval (see Figure 2 – Supplement 6). The effect of the average number of photons collected ( $N_{\text{photons}}$ ) on  $\langle p \rangle_{\text{cir}}$  and  $\text{Var}(p)_{\text{cir}}$  values is illustrated in Figure 2 – Supplement 5. As discussed in Methods,  $\text{Var}(p) = \langle p^2 \rangle - \langle p \rangle^2$ .

<sup>b</sup>Data collected by using intensities from all points in the trajectories for every spot observed. Most trajectories were observed as a single spot.

<sup>c</sup>Data collected by using intensities from the second point in the trajectory for trajectories consisting of at least three frames. This approach eliminates the possibility of photoactivation or photobleaching during data acquisition, and was used for all p-PALM data (unless otherwise indicated). Due to translational diffusion, trajectories with  $\geq 3$  points were rare occurrences in 92% glycerol.

<sup>d</sup>Coverslip adsorbed mEos3 yielded results inconsistent with isotropic orientations, likely due to non-random adsorbed orientations and bias (due to flow or coverslip defects). Nonetheless, p-PALM measurements indicate low rotational mobility.

<sup>e</sup>Nup98 middle mutants were generated by inserting mEos3 at the indicated amino acid position from the N-terminus. Tip mutants were generated by deleting the indicated number of amino acids from the N-terminus and then attaching mEos3 (see Figure 1 – Supplement 2).
