# Supplementary material for: Investigating molecular crowding within nuclear pores using polarization-PALM
Source: eLife journal article supplement (doi:10.7554/elife.28716), 2017-09-26

A 4 x 100 Measurements

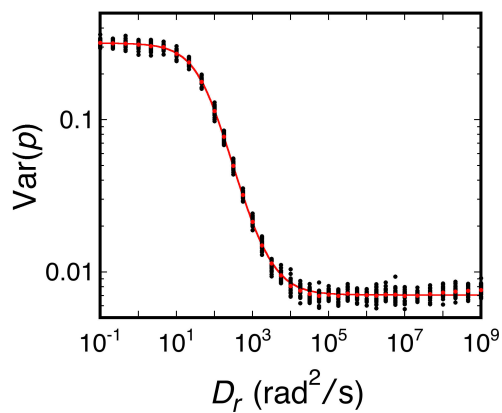

B 4 x 250 Measurements

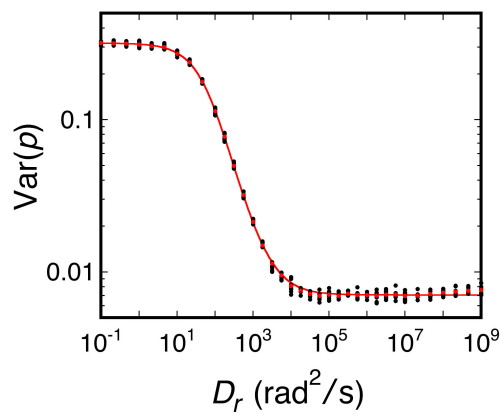

C 4 x 400 Measurements

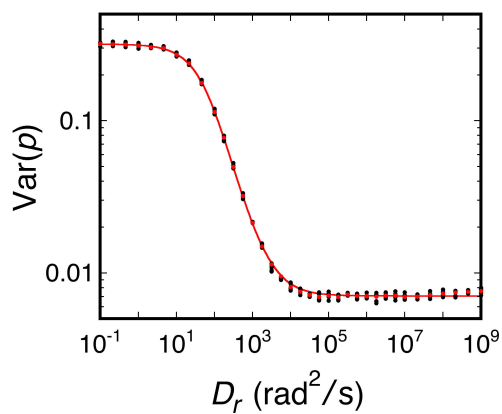

D 4 x 500 Measurements

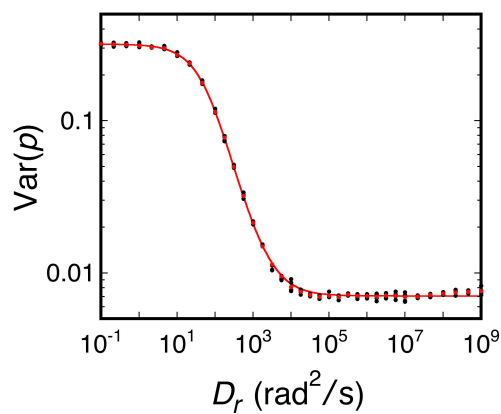

E Average Absolute Error

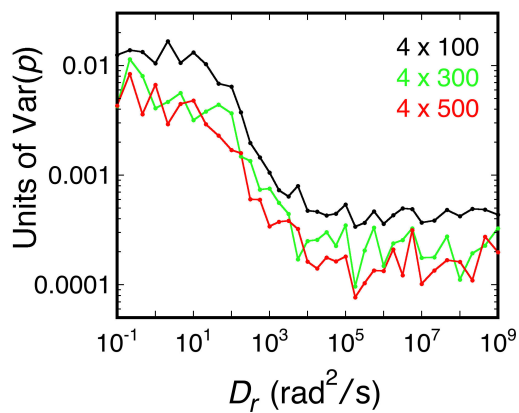

F Average Percent Error

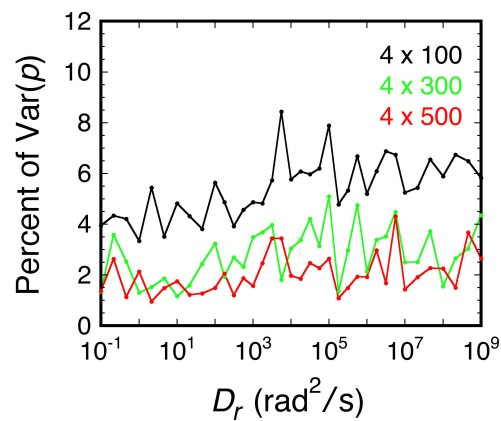

Supplement: supp [file elife-28716-supp-v1.zip]
