# Supplementary material for: Investigating molecular crowding within nuclear pores using polarization-PALM
Source: eLife journal article supplement (doi:10.7554/elife.28716), 2017-09-26
Supplement: supp [file elife_poa_e28716_Supplementary_File_1.doc]

**Table S1: <*p*>cir and <*p2*>cir Valuesa**

| **Sample** | **<*p*>cir ± *SD*** | **<*p2*>cir ± *SD*** | ***Nphotons*** | ***N*** |
| --- | --- | --- | --- | --- |
| ***Pom121-mEos3:*** | | | | |
| Wildtype | 0.014 ± 0.010 | 0.042 ± 0.016 | 376 | 3464 |
| + 10 µM Imp 1 | 0.022 ± 0.008 | 0.062 ± 0.017 | 349 | 2197 |
| + 10 µM Imp 2 | 0.021 ± 0.010 | 0.052 ± 0.006 | 348 | 2622 |
| + 1 mg/mL WGA | 0.024 ± 0.019 | 0.17 ± 0.03 | 372 | 5374 |
| + 10% Hexanediol | 0.043 ± 0.015 | 0.062 ± 0.01 | 460 | 1679 |
|  |  |  |  |  |
| ***mEos3-Pom121:*** | | | | |
| Wildtype | 0.021 ± 0.015  ± | 0.060 ± 0.019 | 372 | 3561 |
| + 10 µM Imp 1 | 0.021 ± 0.017 | 0.066 ± 0.013 | 371 | 2036 |
| + 10 µM Imp 2 | 0.023 ± 0.013  ± | 0.077 ± 0.014 | 339 | 2240 |
| + 1 mg/mL WGA | 0.037 ± 0.011 | 0.11 ± 0.01 | 375 | 2121 |
|  |  |  |  |  |
| ***Nup153-mEos3:*** | | | | |
| Wildtype | 0.002 ± 0.004  ± | 0.037 ± 0.006 | 332 | 2526 |
| + 10 µM Imp 1 | 0.017 ± 0.003 | 0.044 ± 0.012 | 359 | 2876 |
| + 10 µM Imp 2 | 0.016 ± 0.008 | 0.058 ± 0.010 | 338 | 2548 |
| + 1 mg/mL WGA | 0.042 ± 0.018 | 0.13 ± 0.04 | 356 | 2210 |
|  |  |  |  |  |
| ***mEos3-Nup153:*** | | | | |
| Wildtype | 0.019 ± 0.009 | 0.052 ± 0.010 | 371 | 3689 |
| + 10 µM Imp 1 | 0.016 ± 0.015 | 0.061 ± 0.013 | 357 | 2634 |
| + 10 µM Imp 2 | 0.026 ± 0.013 | 0.087 ± 0.018 | 353 | 2022 |
| + 1 mg/mL WGA | 0.020 ± 0.023 | 0.13 ± 0.01 | 380 | 3074 |
|  |  |  |  |  |
| ***RanGAP-mEos3:*** | | | | |
| Wildtype | -0.009 ± 0.006 | 0.056 ± 0.020 | 351 | 3010 |
| + 10 µM Imp 1 | 0.002 ± 0.011 | 0.059 ± 0.028 | 356 | 2178 |
| + 10 µM Imp 2 | 0.002 ± 0.009 | 0.12 ± 0.01 | 334 | 2410 |
| + 1 mg/mL WGA | 0.045 ± 0.005 | 0.20 ± 0.02 | 356 | 3040 |
| + 4% Formaldehyde | 0.087 ± 0.019 | 0.27 ± 0.03 | 322 | 2548 |
|  |  |  |  |  |
| ***mEos3-Nup98:*** | | | | |
| Wildtype | 0.015 ± 0.007 | 0.037 ± 0.010 | 411 | 2243 |
| + 10 µM Imp 1 | 0.014 ± 0.012 | 0.048 ± 0.014 | 337 | 2181 |
| + 10 µM Imp 2 | 0.019 ± 0.008 | 0.044 ± 0.004 | 365 | 2051 |
| + 1 mg/mL WGA | 0.060 ± 0.011 | 0.19 ± 0.02 | 363 | 2739 |
|  |  |  |  |  |
| ***mEos3:*** | | | | |
| In 92% glycerol (all points)b | 0.007 ± 0.001 | 0.034 ± 0.002 | 314 | 38380 |
| In 92% glycerol (2nd points)c | 0.007 ± 0.005 | 0.027 ± 0.008 | 378 | 458 |
| Adsorbed on a coverslipd | 0.12 ± 0.014 | 0.28 ± 0.01 | 342 | 2604 |
|  |  |  |  |  |
|  |  |  |  |  |
| ***mEos3-Nup98 Middle Mutantse:*** | | | | |
| N-terminus | 0.015 ± 0.007 | 0.037 ± 0.010 | 411 | 2243 |
| 110mid | 0.013 ± 0.003 | 0.056 ± 0.012 | 397 | 3730 |
| 400mid | 0.012 ± 0.007 | 0.039 ± 0.003 | 397 | 2525 |
| 500mid | 0.039 ± 0.011 | 0.082 ± 0.007 | 366 | 3131 |
| 700mid | 0.012 ± 0.016 | 0.12 ± 0.02 | 351 | 2841 |
|  |  |  |  |  |
| ***mEos3-Nup98 Middle Mutantse (+ 10 µM Imp 1):*** | | | | |
| N-terminus | 0.014 ± 0.012 | 0.048 ± 0.014 | 337 | 2181 |
| 110mid | 0.018 ± 0.005 | 0.044 ± 0.012 | 358 | 2412 |
| 400mid | 0.019 ± 0.001 | 0.052 ± 0.006 | 357 | 2769 |
| 500mid | 0.019 ± 0.009 | 0.073 ± 0.021 | 357 | 2577 |
| 700mid | 0.027 ± 0.006 | 0.11 ± 0.02 | 353 | 2243 |
|  |  |  |  |  |
| ***mEos3-Nup98 Middle Mutantse (+ 1 mg/mL WGA):*** | | | | |
| N-terminus | 0.060 ± 0.011 | 0.19 ± 0.02 | 363 | 2739 |
| 110mid | 0.040 ± 0.013 | 0.24 ± 0.02 | 367 | 4563 |
| 400mid | 0.047 ± 0.018 | 0.29 ± 0.04 | 329 | 3107 |
| 500mid | 0.053 ± 0.014 | 0.21 ± 0.02 | 382 | 2617 |
| 700mid | 0.033 ± 0.024 | 0.18 ± 0.04 | 371 | 2391 |
|  |  |  |  |  |
| ***mEos3-Nup98 Tip Mutantse:*** | | | | |
| N-terminus | 0.015 ± 0.007 | 0.037 ± 0.010 | 411 | 2243 |
| 110tip | -0.006 ± 0.014 | 0.034 ± 0.014 | 401 | 1789 |
| 110tip + 1 mg/mL WGA | 0.027 ± 0.028 | 0.19 ± 0.009 | 459 | 1220 |
| 400tip | -0.002 ± 0.006 | 0.031 ± 0.007 | 382 | 2212 |
|  |  |  |  |  |
| ***mEos2-Nup98:*** | | | | |
| Wildtype | 0.004 ± 0.012 | 0.097 ± 0.011 | 353 | 3660 |
|  |  |  |  |  |

a*N* individual measurements were pooled into 4 datasets of equal size. The standard deviation (*SD*) was calculated from the 4 independently determined average values. *SD*s were carried to the same decimal value as the mean, which was assumed to be accurate to 2 significant figures, or the nearest thousandth. The mean ± SD approximately represents the 85% confidence interval (see Figure 2 – Supplement 6). The effect of the average number of photons collected (*Nphotons*) on <*p*>cir and Var(*p*)cir values is illustrated in Figure 2 – Supplement 5. Theoretically, for circular excitation, <*p2*>cir = Var(*p*)cir since <*p*>cir = 0 (see Methods), which was approximately true in most cases.

bData collected by using intensities from all points in the trajectories for every spot observed. Most trajectories were observed as a single spot.

cData collected by using intensities from the second point in the trajectory for trajectories consisting of at least three frames. This approach eliminates the possibility of photoactivation or photobleaching during data acquisition, and was used for all p-PALM data (unless otherwise indicated). Due to translational diffusion, trajectories with ≥ 3 points were rare occurrences in 92% glycerol.

dCoverslip adsorbed mEos3 yielded results inconsistent with isotropic orientations, likely due to non-random adsorbed orientations and bias (due to flow or coverslip defects). Nonetheless, p-PALM measurements indicate low rotational mobility.

eNup98 middle mutants were generated by inserting mEos3 at the indicated amino acid position from the N-terminus. Tip mutants were generated by deleting the indicated number of amino acids from the N-terminus and then attaching mEos3 (see Figure 1 – Supplement 2).

**Table S2: <*p*>lin and Var(*p*)lin Valuesa**

| **Sample** | **<*p*>lin ± *SD*** | **Var(*p*)lin ± *SD*** | ***Nphotons*** | ***N*** |
| --- | --- | --- | --- | --- |
| ***Pom121-mEos3:*** | | | | |
| Wildtype | 0.42 ± 0.03 | 0.024 ± 0.044 | 394 | 558 |
| + 10 µM Imp 1 | 0.45 ± 0.01 | 0.028 ± 0.024 | 298 | 855 |
| + 1 mg/mL WGA | 0.42 ± 0.08 | 0.074 ± 0.115 | 395 | 922 |
| 10% Hexanediol | 0.45 ± 0.02 | 0.0375 ± 0.030 | 392 | 325 |
|  |  |  |  |  |
| ***Nup153-mEos3:*** | | | | |
| Wildtype | 0.41 ± 0.01 | 0.012 ± 0.017 | 469 | 757 |
|  |  |  |  |  |
| ***mEos3-Nup153:*** | | | | |
| Wildtype | 0.46 ± 0.01  ± | 0.018 ± 0.017 | 305 | 959 |
|  |  |  |  |  |
| ***mEos3:*** | | | | |
| In 92% glycerol (all points)b | 0.50 ± 0.01 | 0.030 ± 0.017 | 240 | 16720 |
| In 92% glycerol (2nd points)c | 0.47 ± 0.01 | 0.019 ± 0.017 | 306 | 246 |
| Adsorbed on a coverslipd | 0.44 ± 0.02 | 0.12 ± 0.04 | 390 | 844 |
|  |  |  |  |  |
| ***mEos3-Nup98 Middle Mutantse:*** | | | | |
| N-terminus | 0.41 ± 0.02 | 0.022 ± 0.030 | 371 | 1100 |
| 110mid | 0.43 ± 0.02 | 0.025 ± 0.030 | 272 | 675 |
| 400mid | 0.44 ± 0.02 | 0.016 ± 0.030 | 413 | 296 |
| 500mid | 0.44 ± 0.05 | 0.036 ± 0.077 | 415 | 454 |
| 700mid | 0.42 ± 0.02 | 0.024 ± 0.035 | 384 | 1010 |
|  |  |  |  |  |
| ***mEos3-Nup98 Tip Mutantse:*** | | | | |
| N-terminus | 0.41 ± 0.02 | 0.022 ± 0.030 | 371 | 1100 |
| 110tip | 0.42 ± 0.03 | 0.014 ± 0.044 | 313 | 565 |
|  |  |  |  |  |

a*N* individual measurements were pooled into 4 datasets of equal size. The standard deviation (*SD*) was calculated from the 4 independently determined average values. *SD*s were carried to the same decimal value as the mean, which was assumed to be accurate to 2 significant figures, or the nearest thousandth. The mean ± SD approximately represents the 85% confidence interval (see Figure 2 – Supplement 6). The effect of the average number of photons collected (*Nphotons*) on <*p*>cir and Var(*p*)cir values is illustrated in Figure 2 – Supplement 5. As discussed in Methods, Var(*p*) = <*p2*> – <*p*>.

bData collected by using intensities from all points in the trajectories for every spot observed. Most trajectories were observed as a single spot.

cData collected by using intensities from the second point in the trajectory for trajectories consisting of at least three frames. This approach eliminates the possibility of photoactivation or photobleaching during data acquisition, and was used for all p-PALM data (unless otherwise indicated). Due to translational diffusion, trajectories with ≥ 3 points were rare occurrences in 92% glycerol.

dCoverslip adsorbed mEos3 yielded results inconsistent with isotropic orientations, likely due to non-random adsorbed orientations and bias (due to flow or coverslip defects). Nonetheless, p-PALM measurements indicate low rotational mobility.

eNup98 middle mutants were generated by inserting mEos3 at the indicated amino acid position from the N-terminus. Tip mutants were generated by deleting the indicated number of amino acids from the N-terminus and then attaching mEos3 (see Figure 1 – Supplement 2).
