# Supplementary figures and images for: Investigating molecular crowding within nuclear pores using polarization-PALM
Source: eLife journal article supplement (doi:10.7554/elife.28716), 2017-09-26

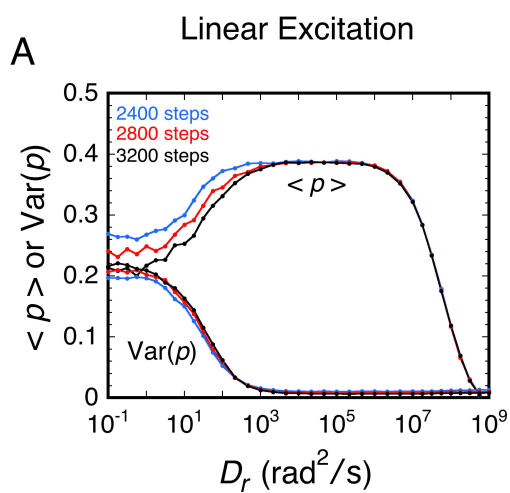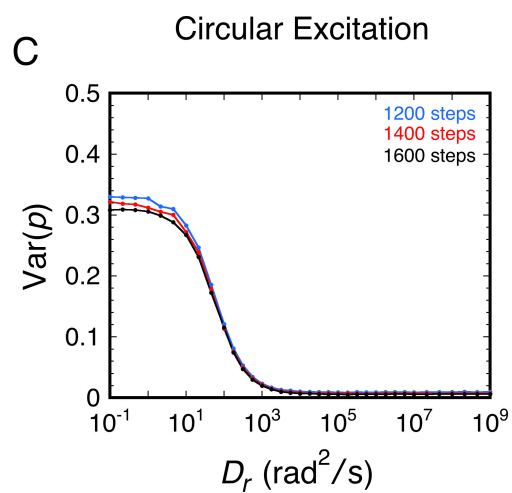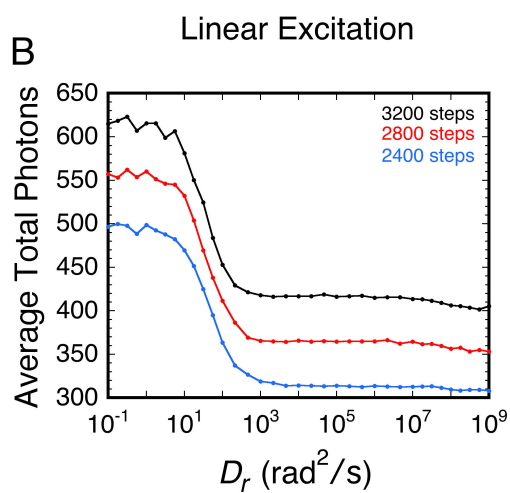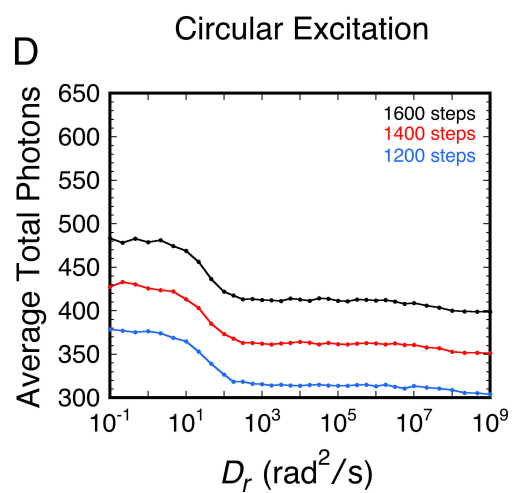

Supplement: supp [file elife-28716-supp-v1.zip]

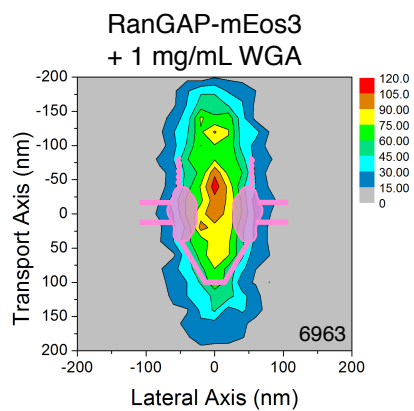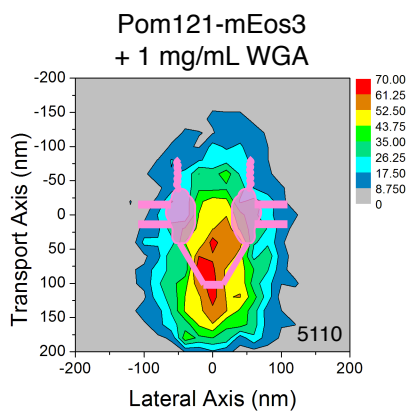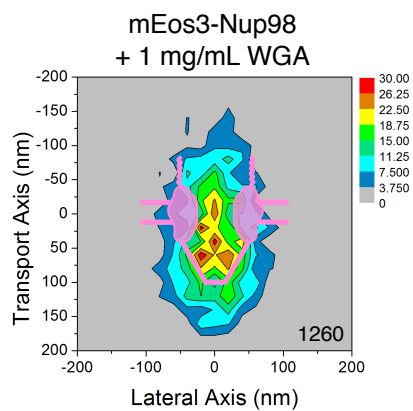

Supplement: supp [file elife-28716-supp-v1.zip]

A

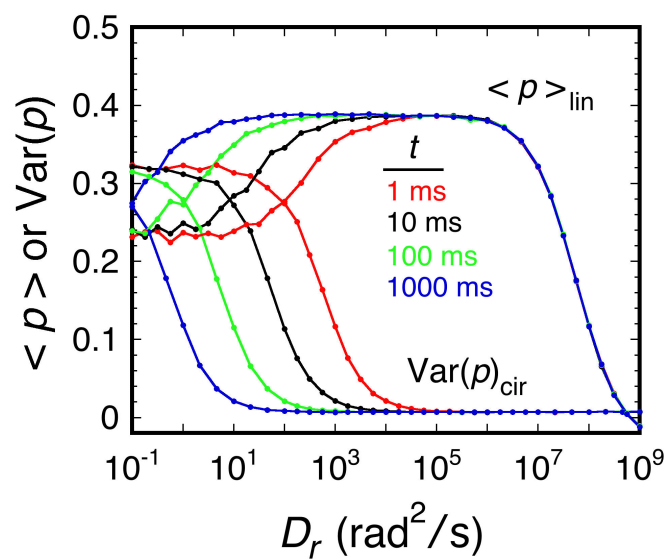

B

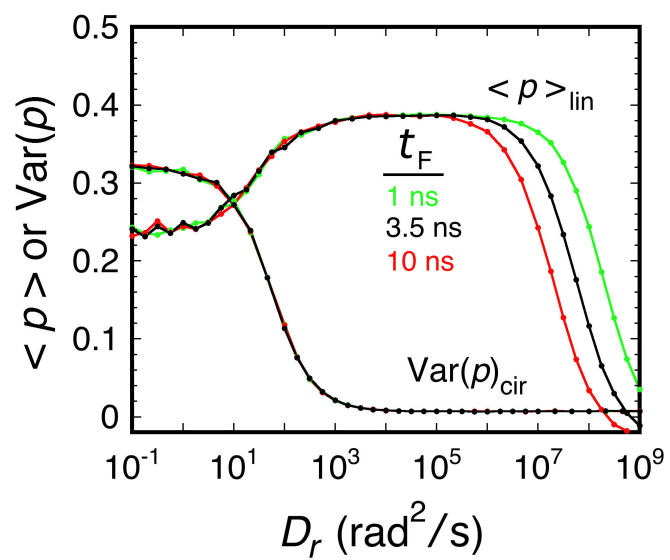

Supplement: supp [file elife-28716-supp-v1.zip]

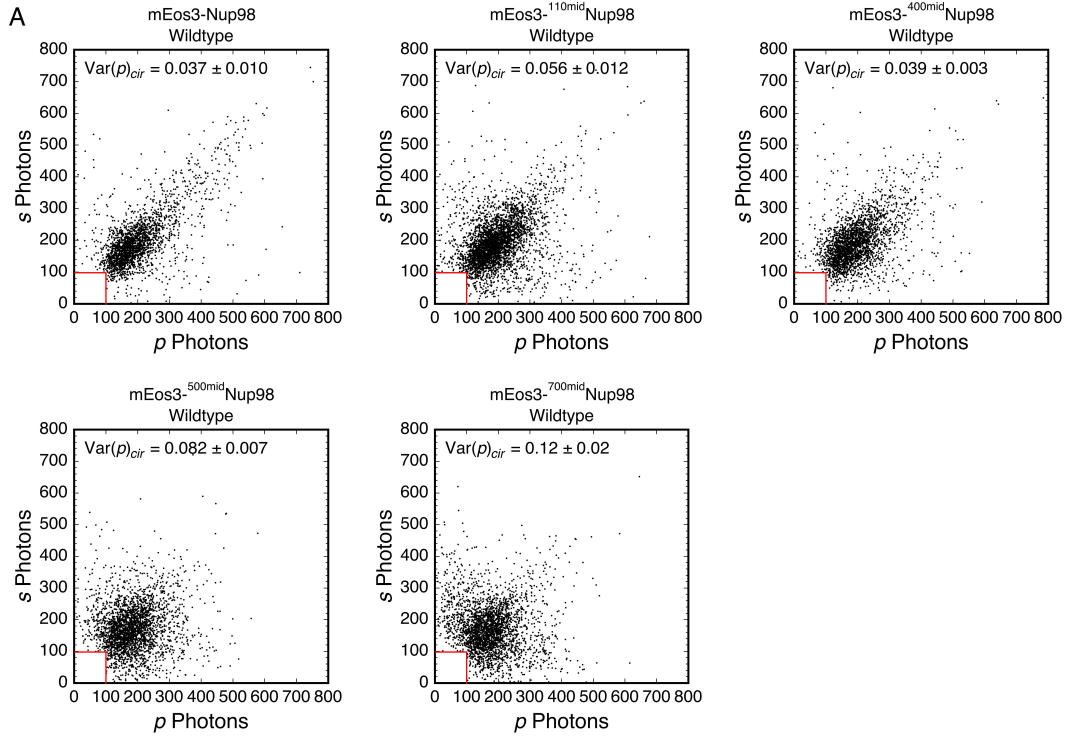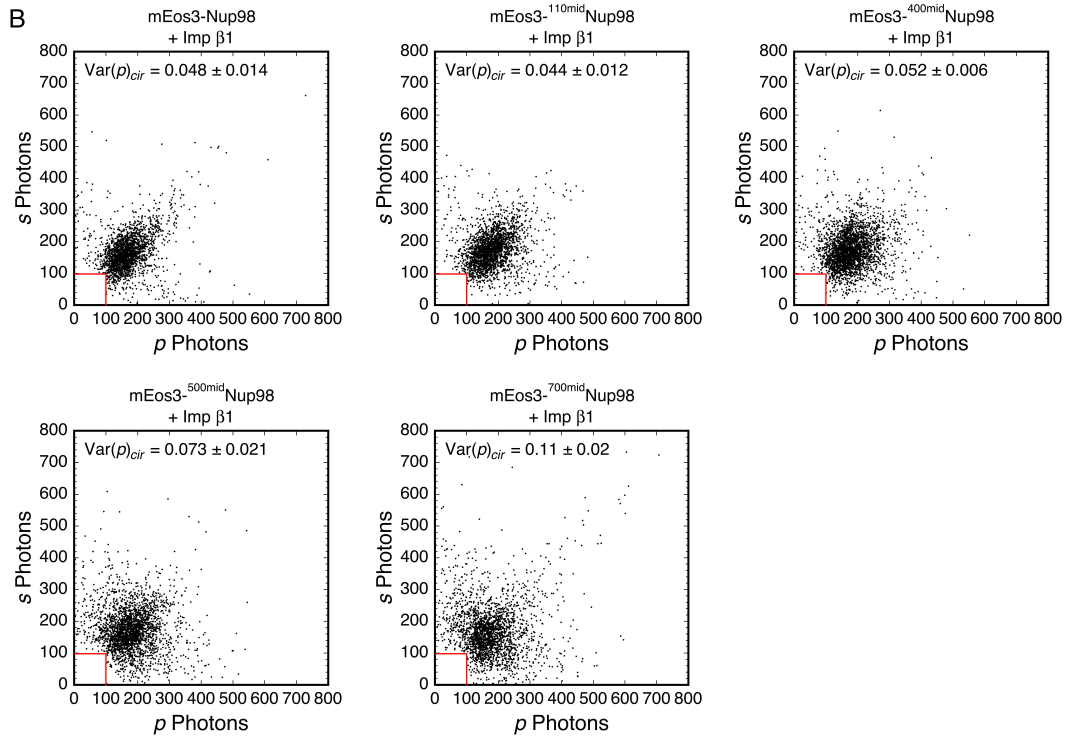

Supplement: supp [file elife-28716-supp-v1.zip]

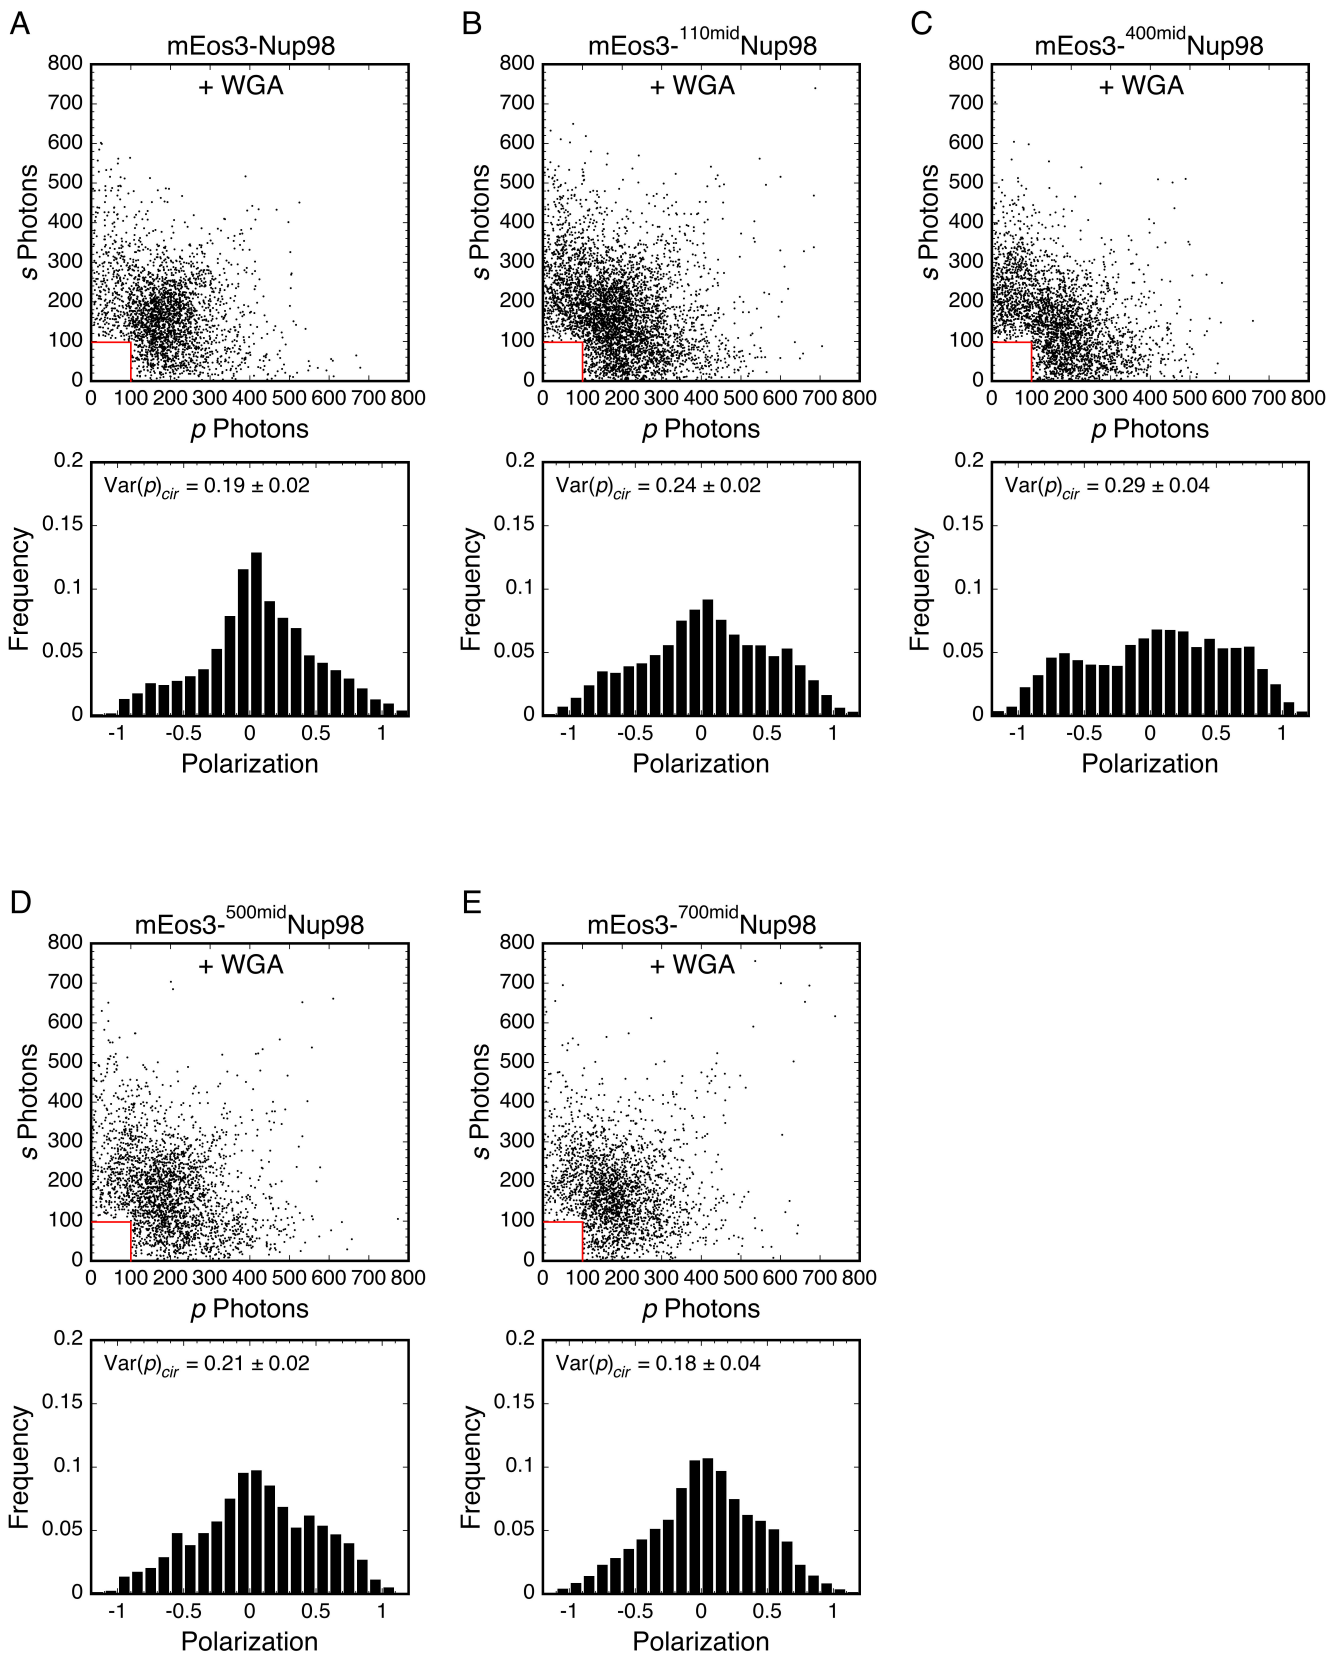

Supplement: supp [file elife-28716-supp-v1.zip]

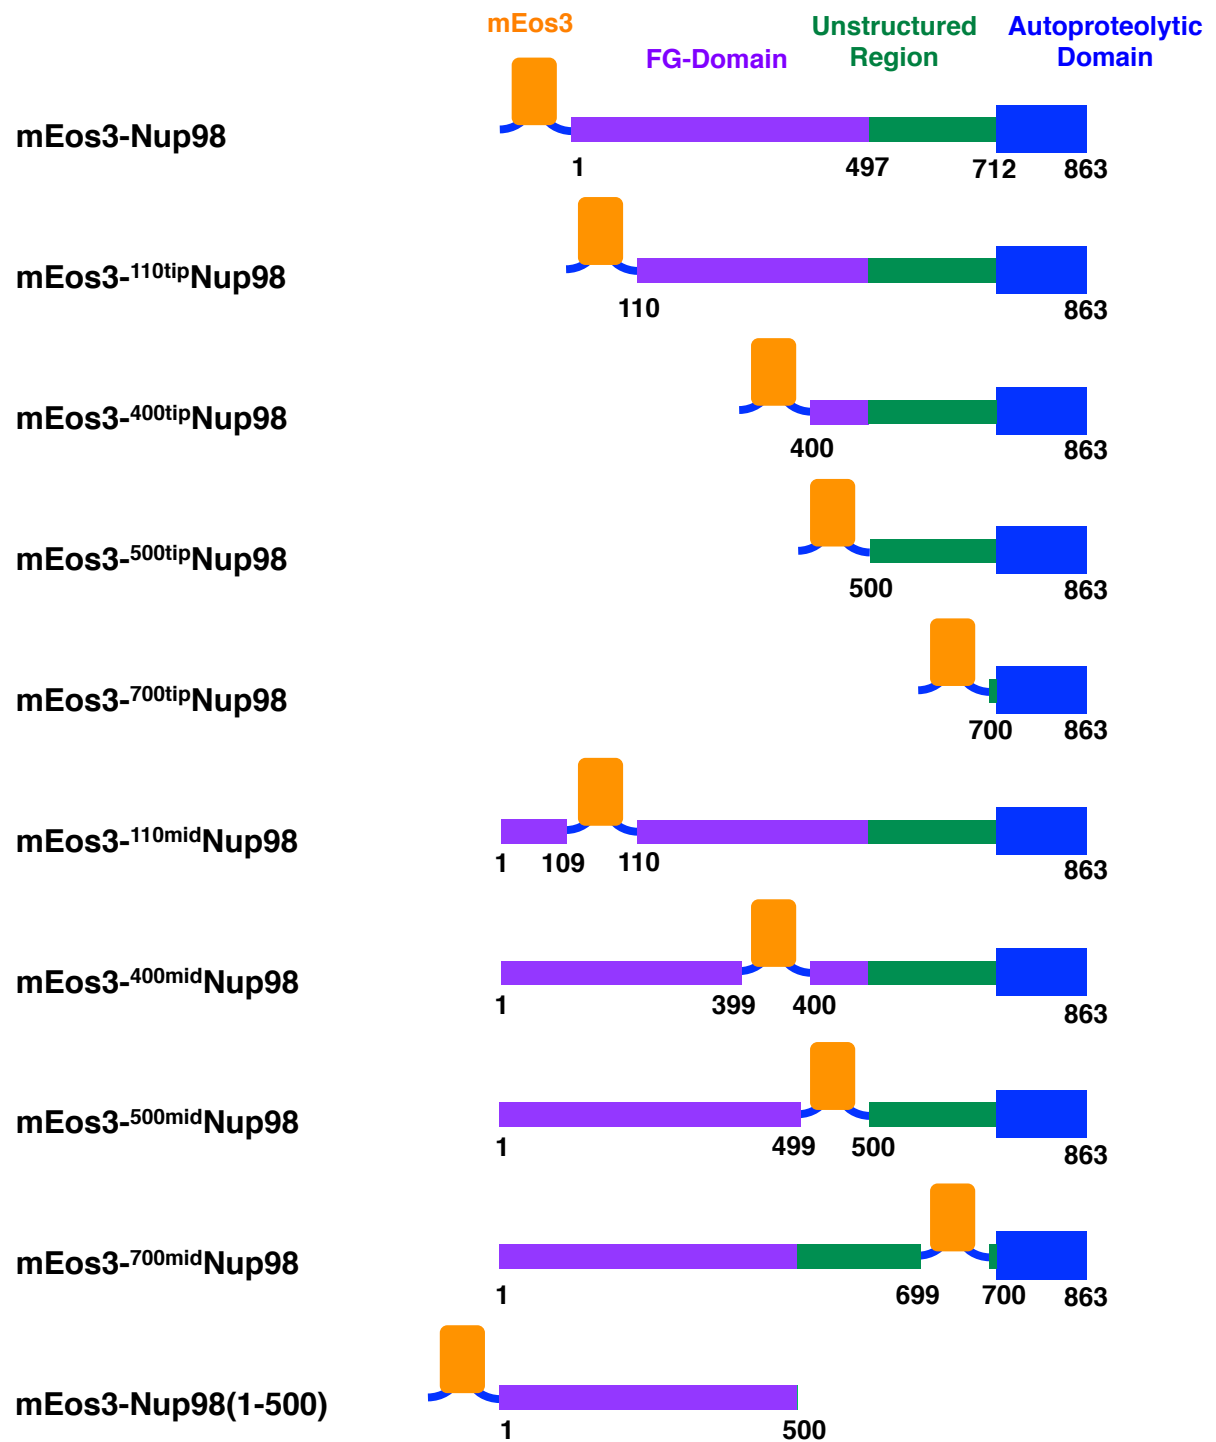

Supplement: supp [file elife-28716-supp-v1.zip]

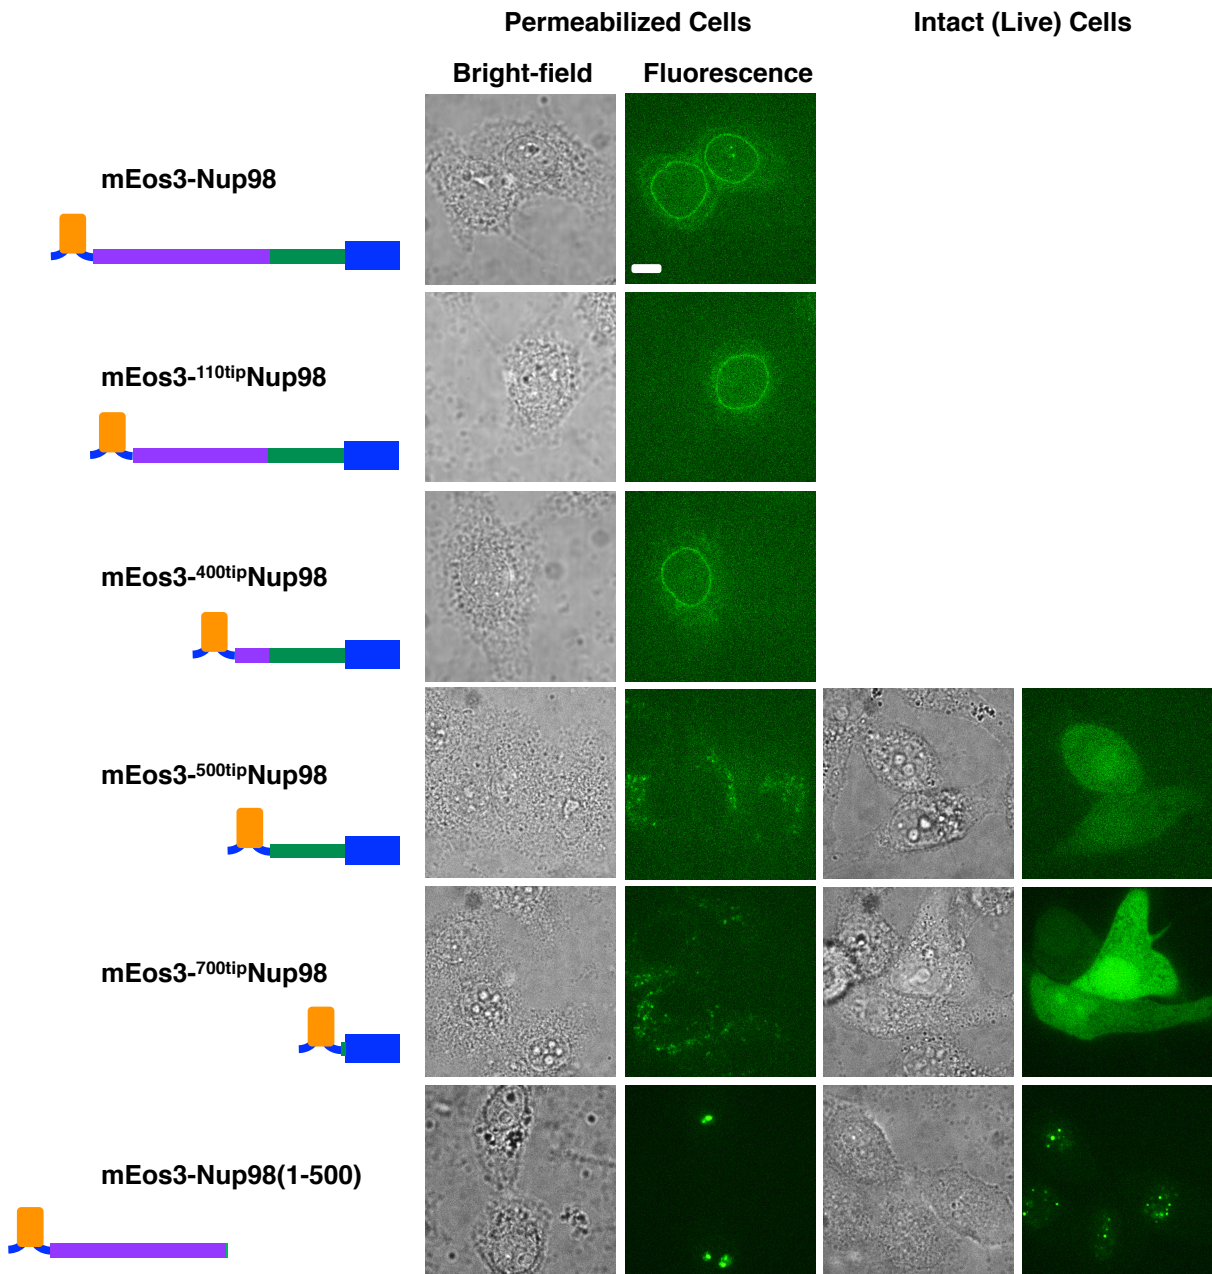

Supplement: supp [file elife-28716-supp-v1.zip]

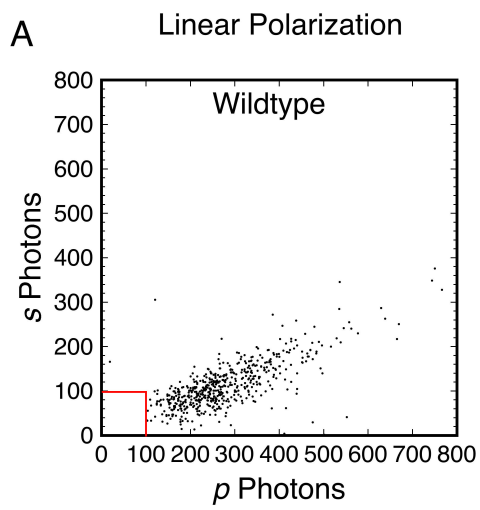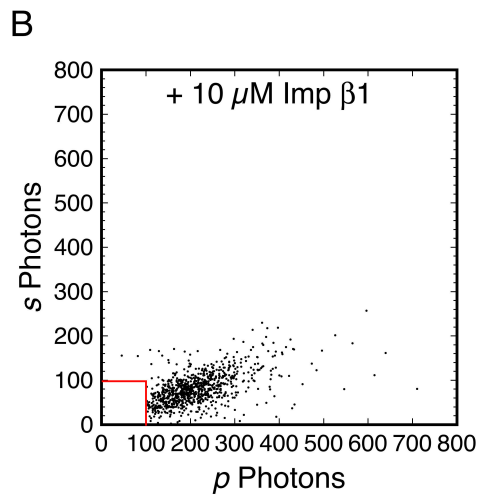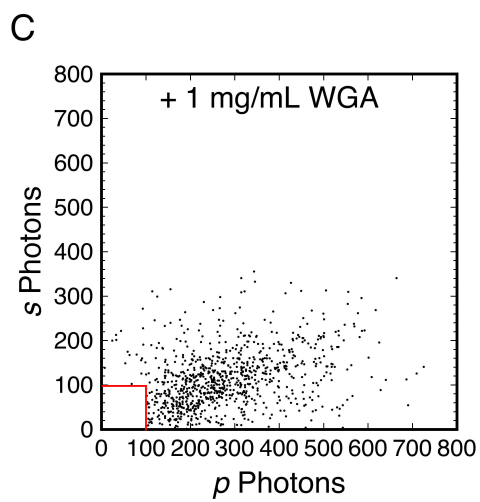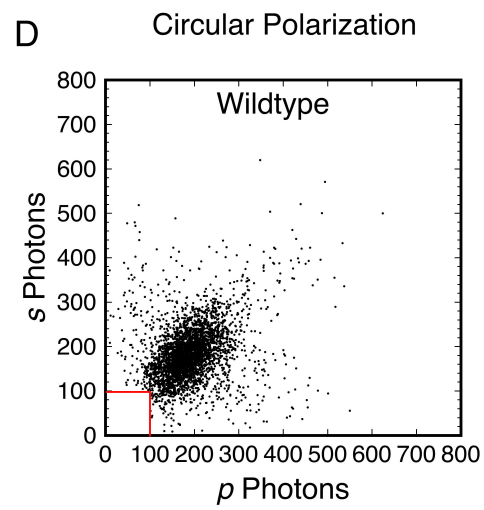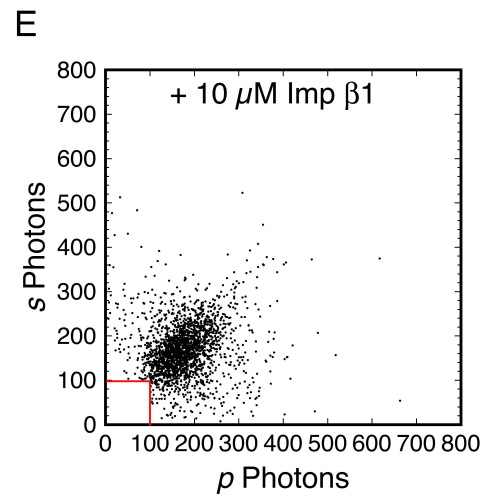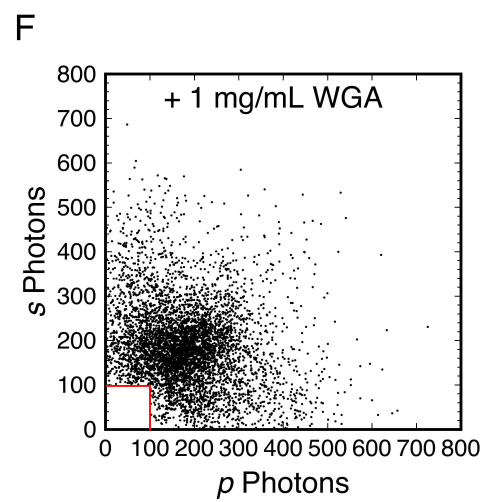

Supplement: supp [file elife-28716-supp-v1.zip]

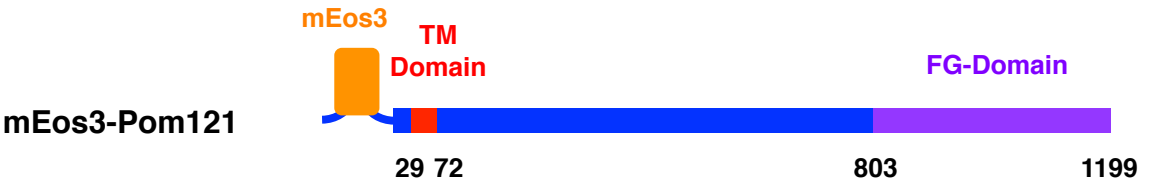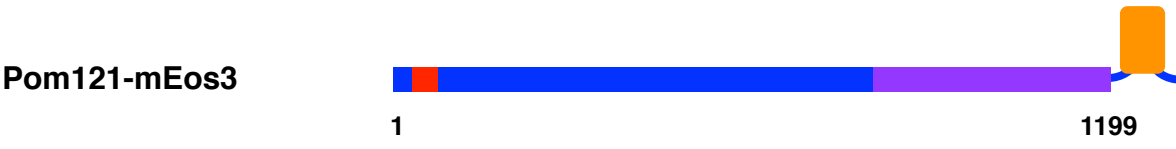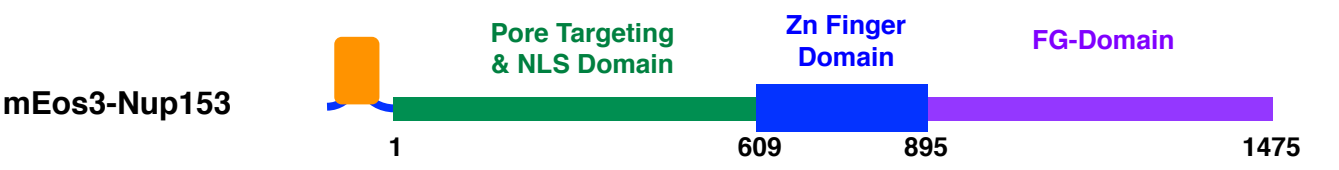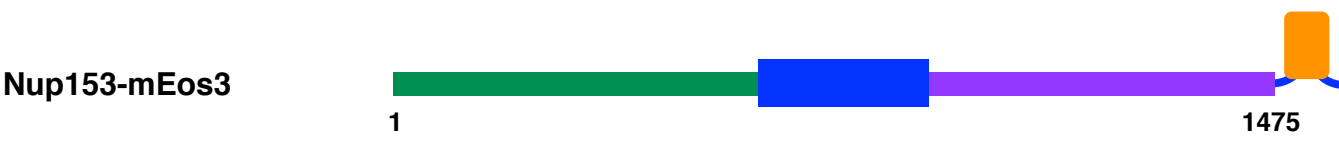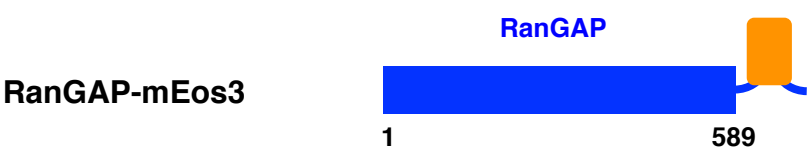

Supplement: supp [file elife-28716-supp-v1.zip]

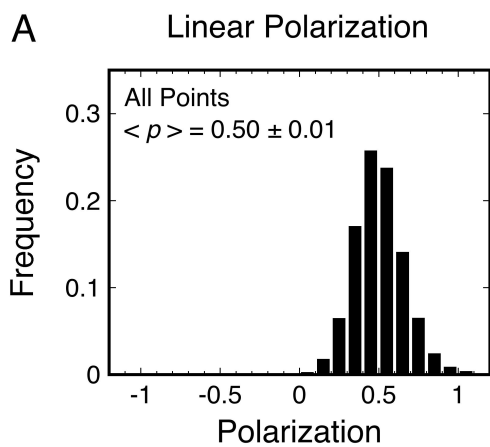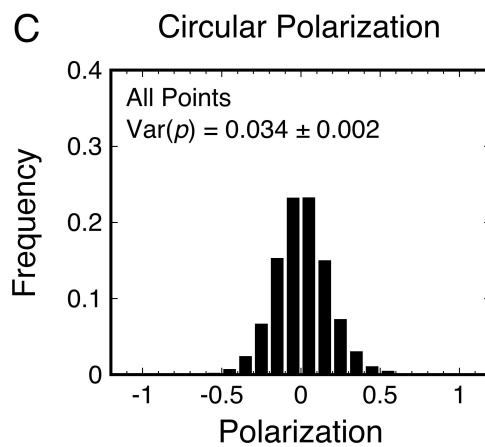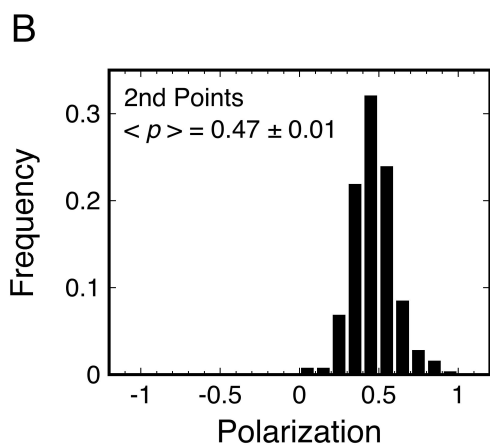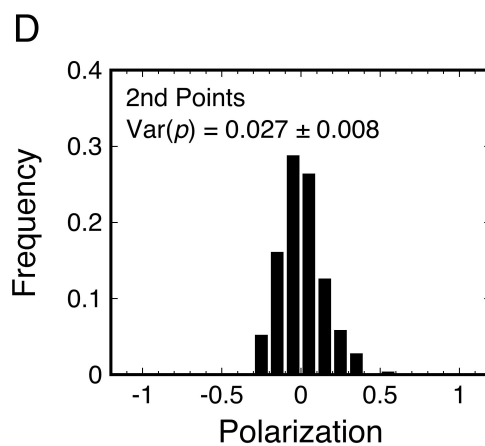

Supplement: supp [file elife-28716-supp-v1.zip]

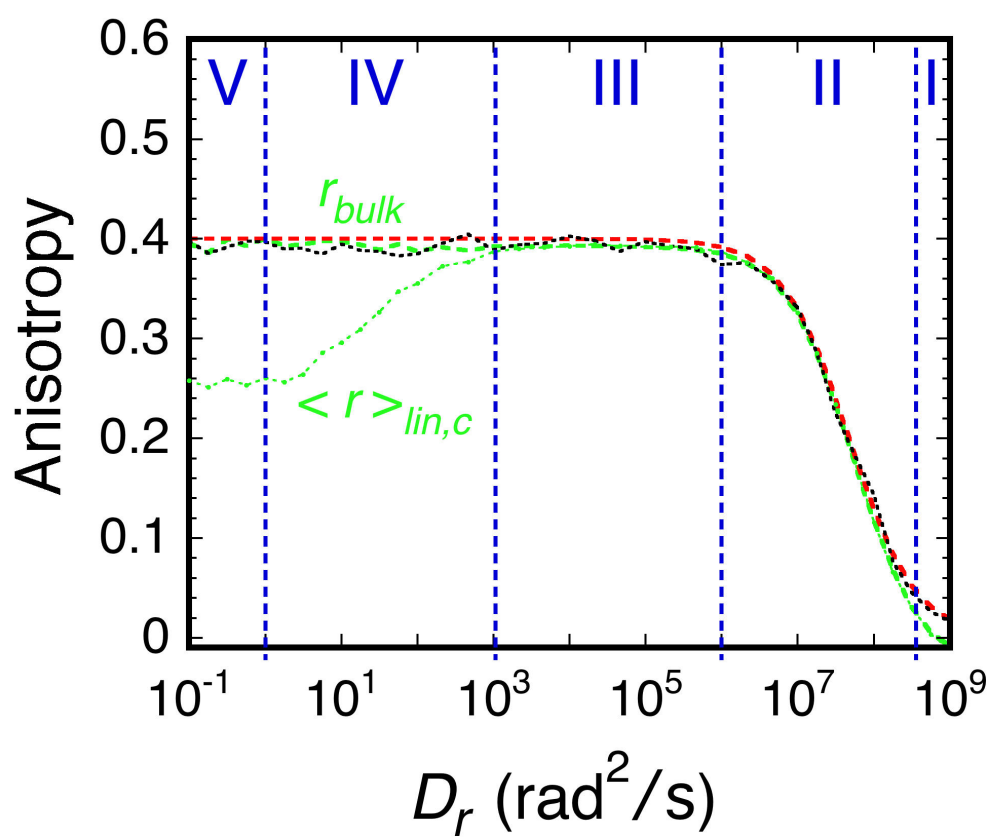

Supplement: supp [file elife-28716-supp-v1.zip]

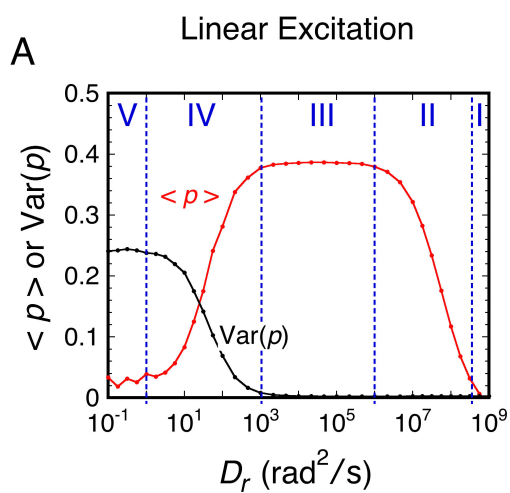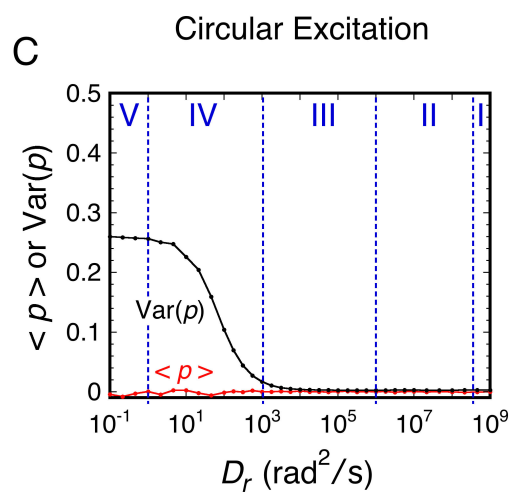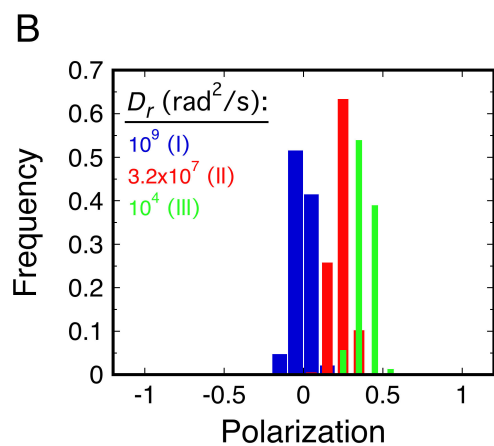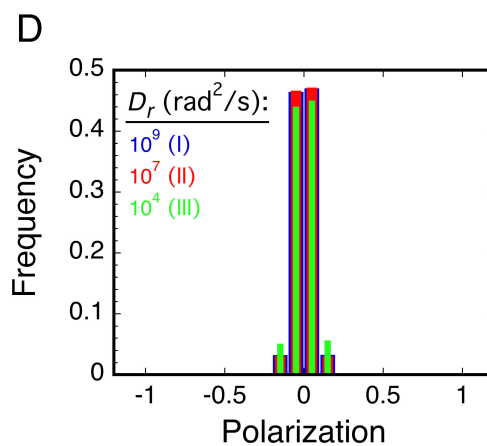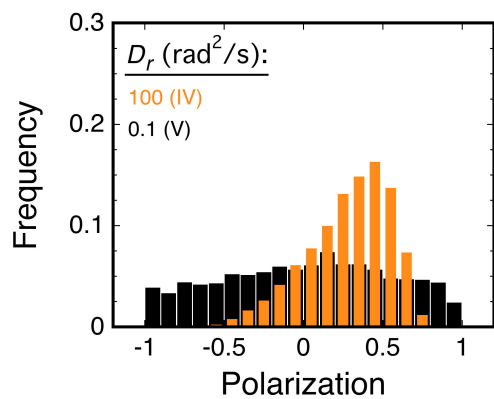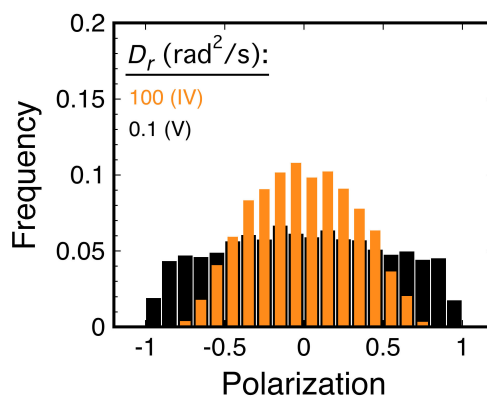

Supplement: supp [file elife-28716-supp-v1.zip]

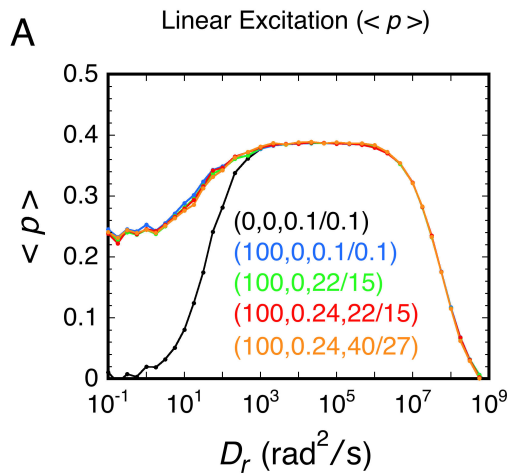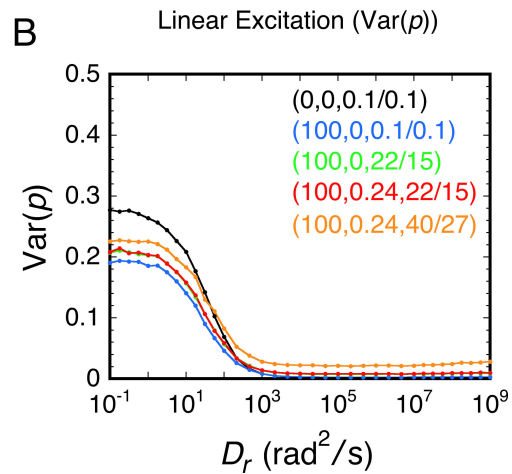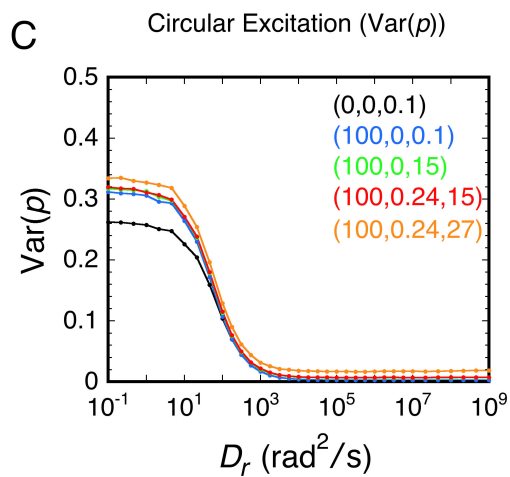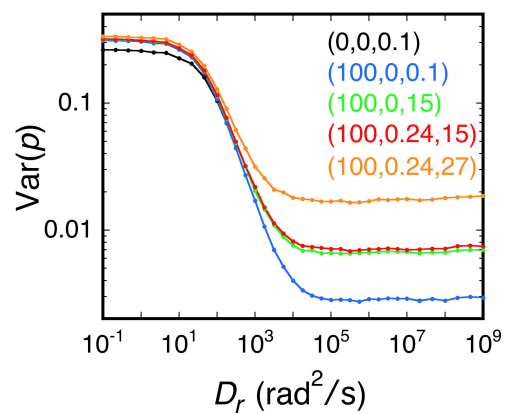

Supplement: supp [file elife-28716-supp-v1.zip]

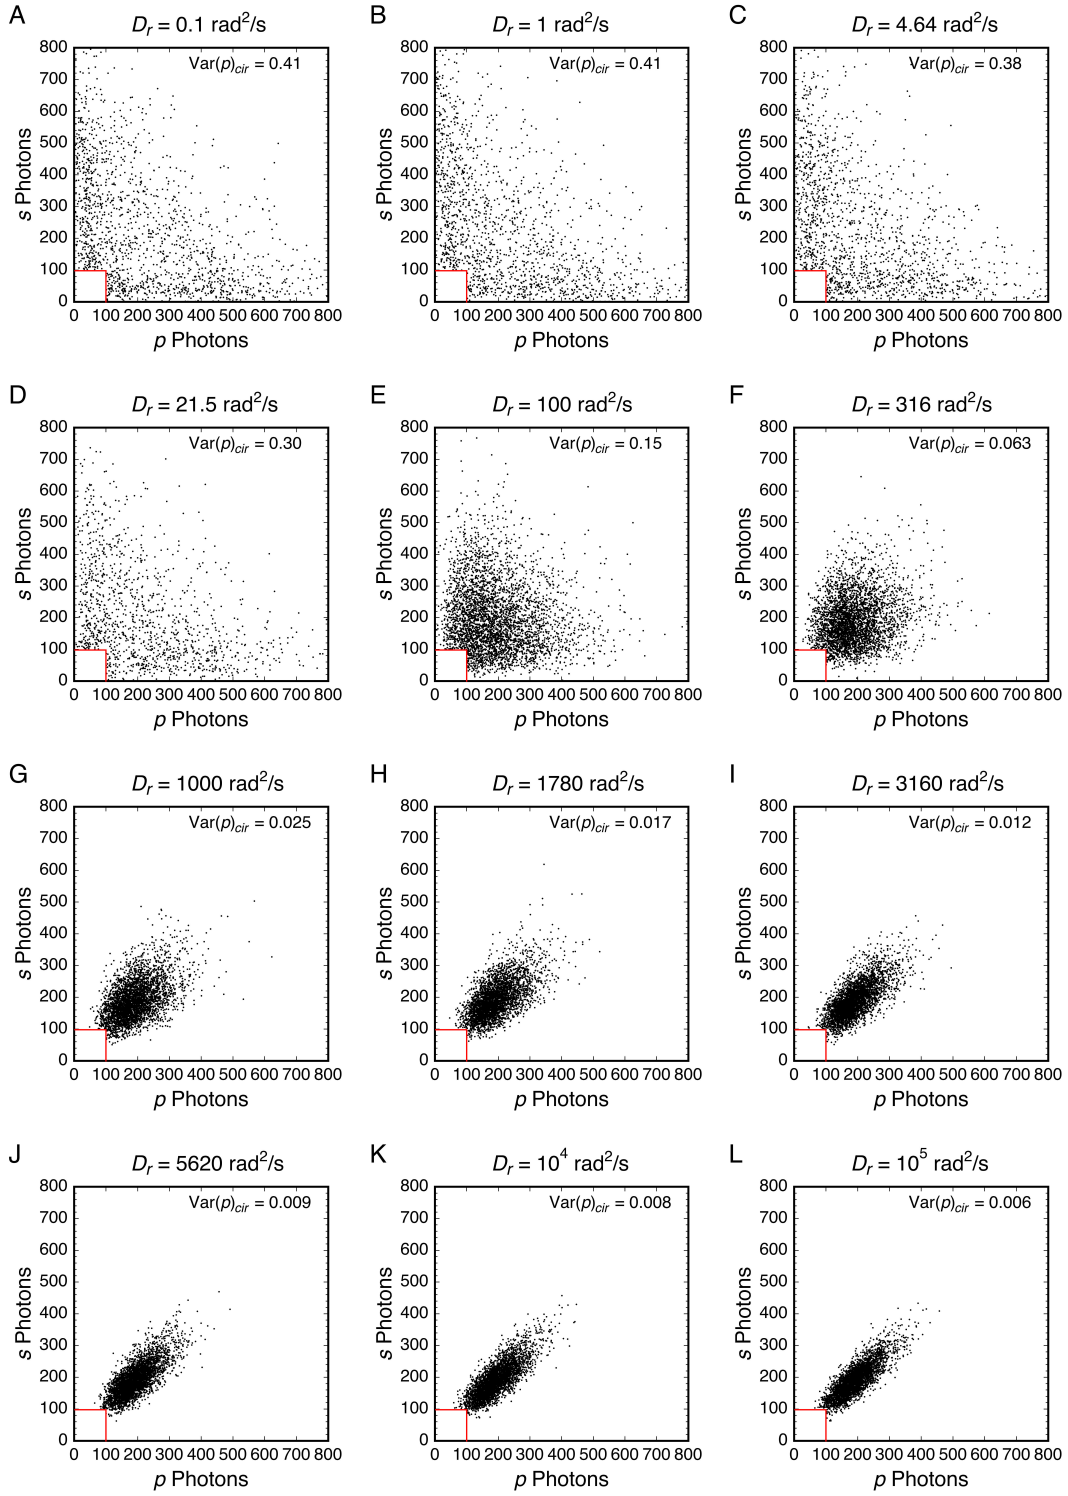

Supplement: supp [file elife-28716-supp-v1.zip]

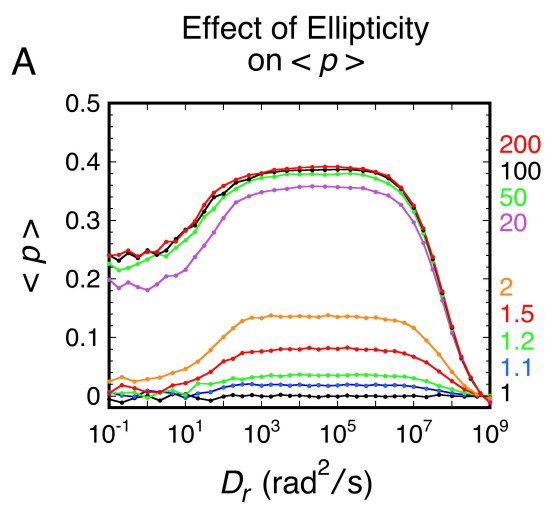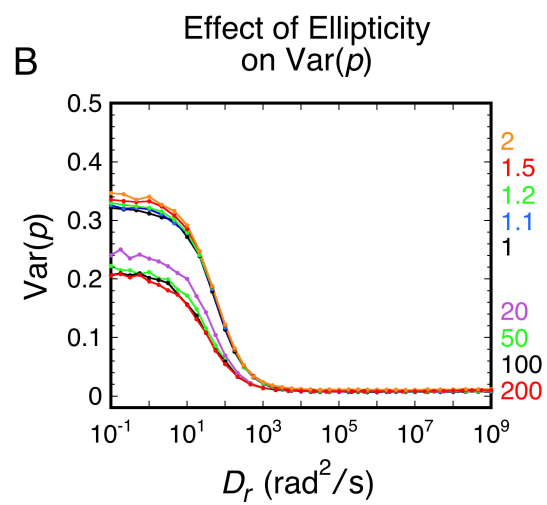

Supplement: supp [file elife-28716-supp-v1.zip]

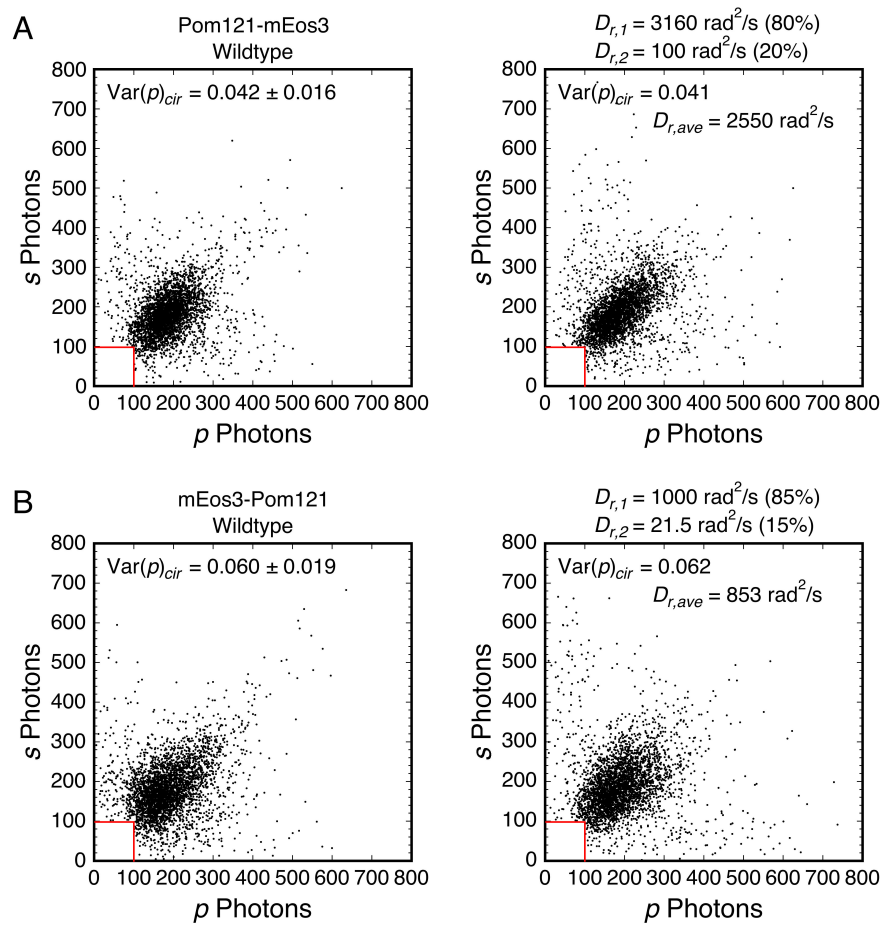

Supplement: supp [file elife-28716-supp-v1.zip]

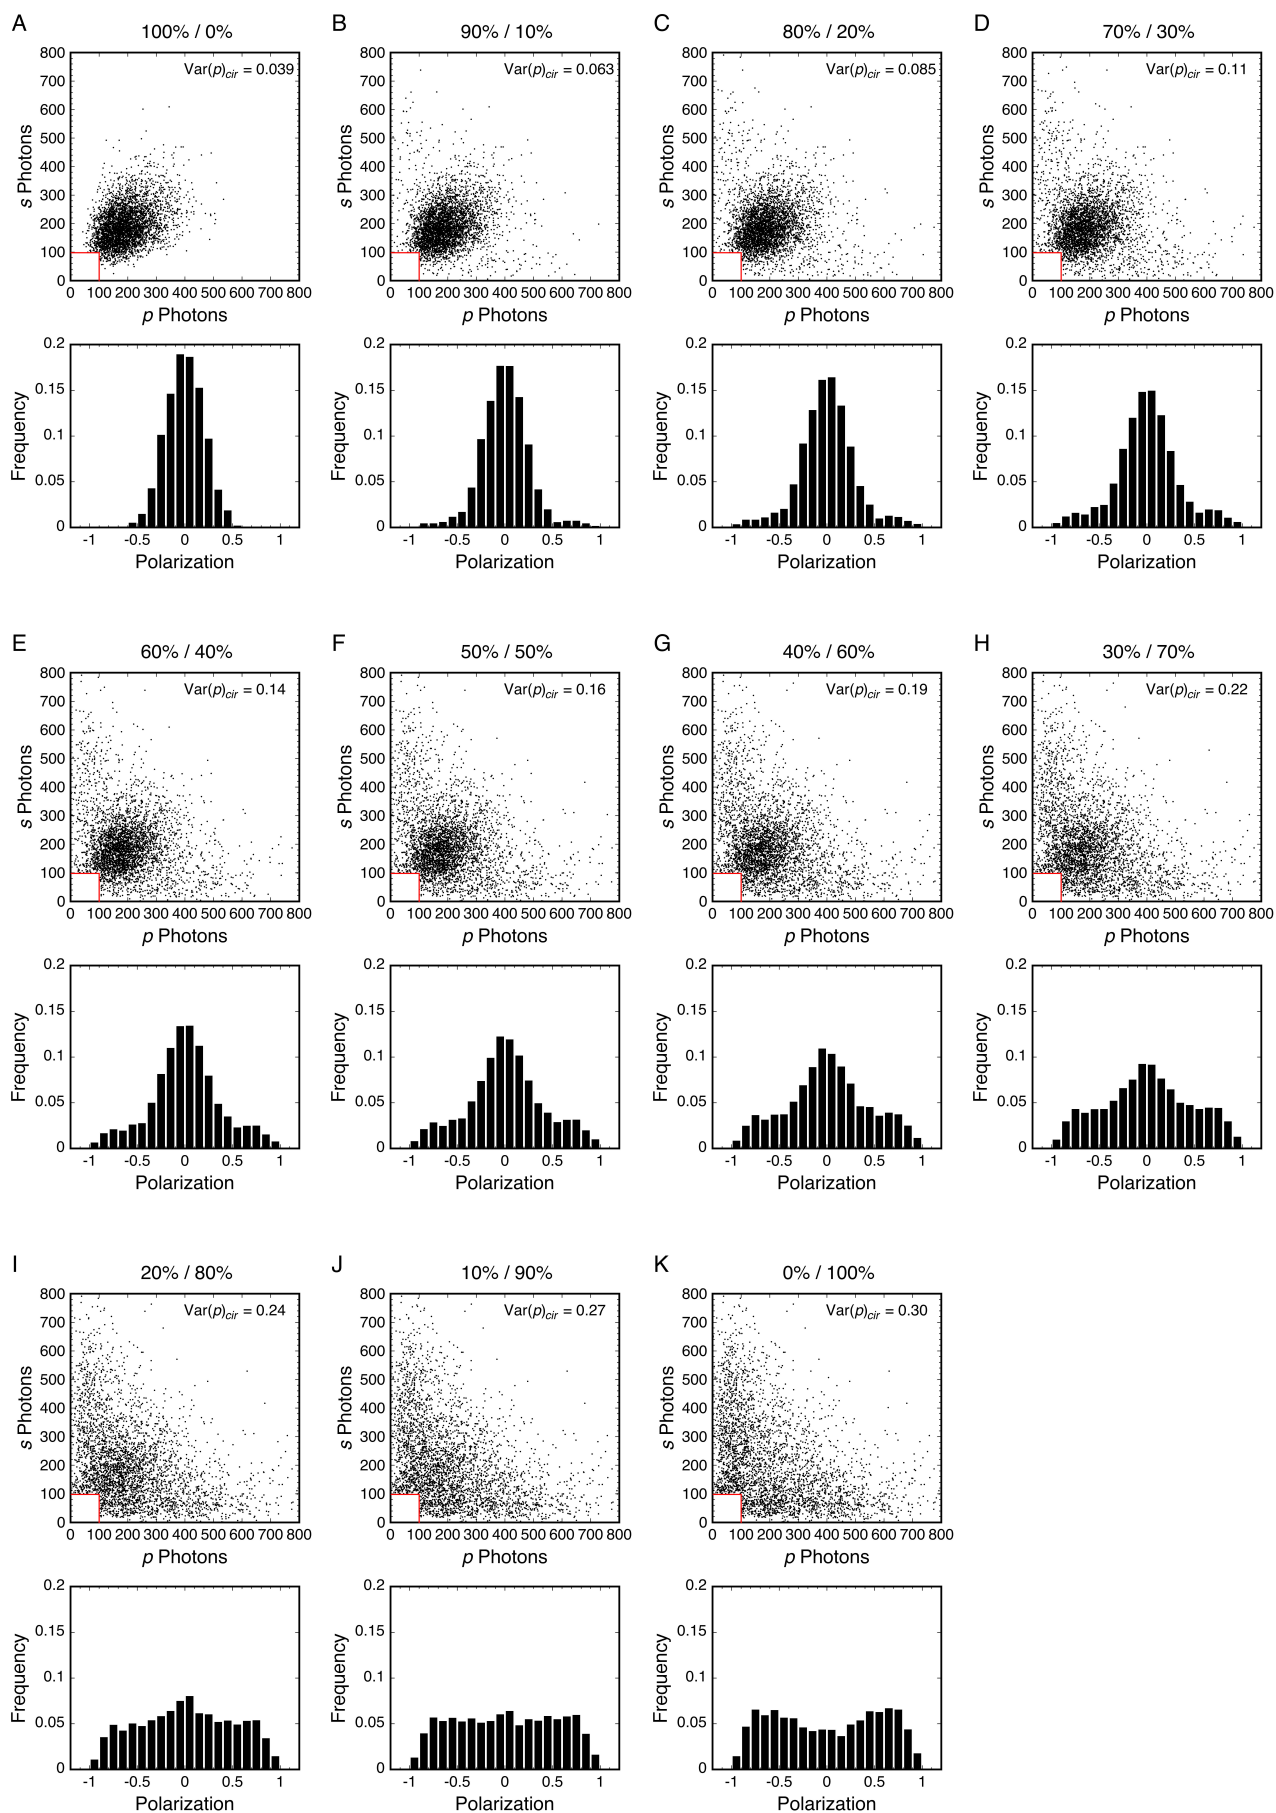

Supplement: supp [file elife-28716-supp-v1.zip]

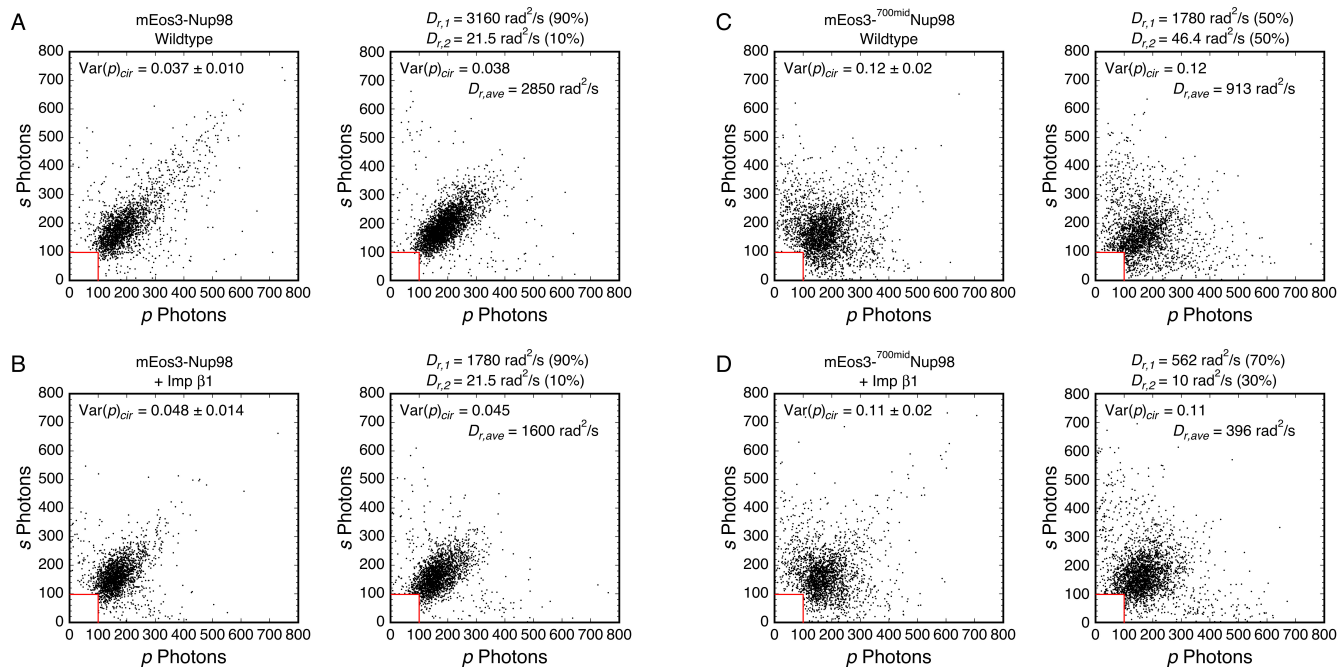

Supplement: supp [file elife-28716-supp-v1.zip]

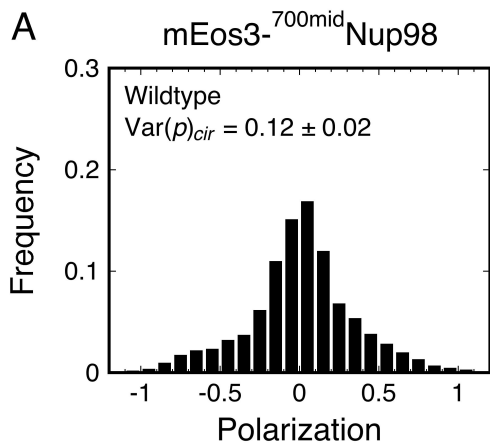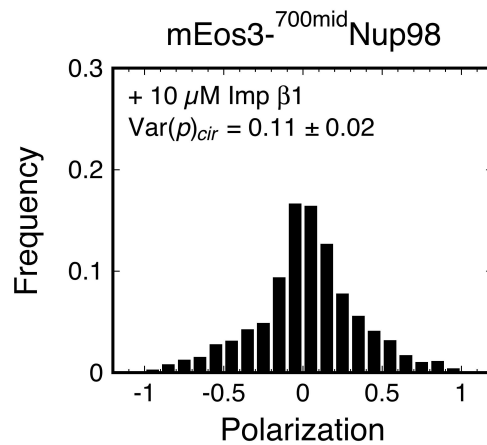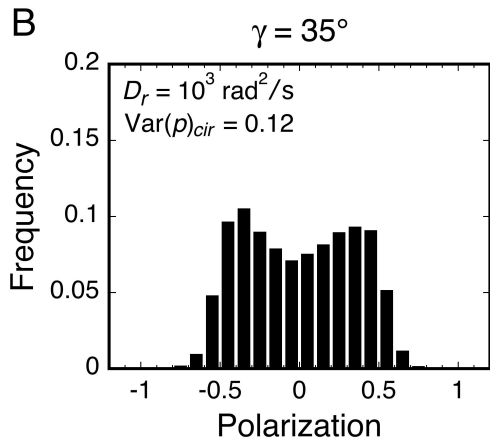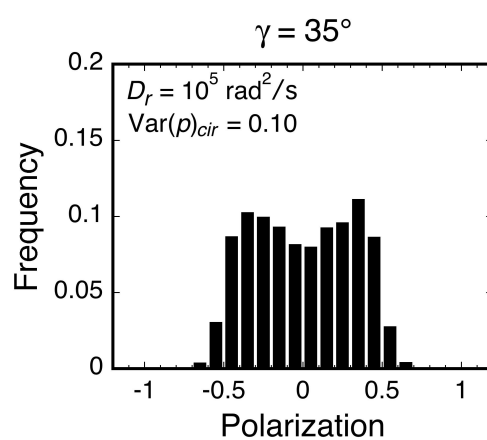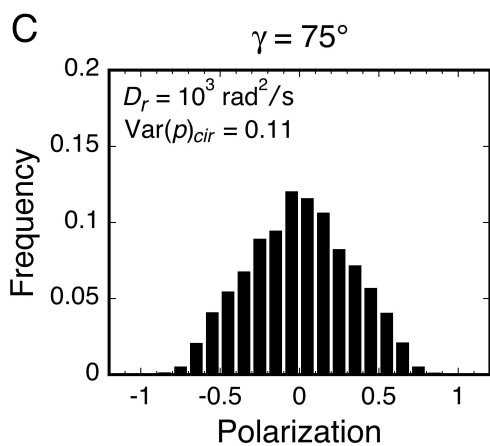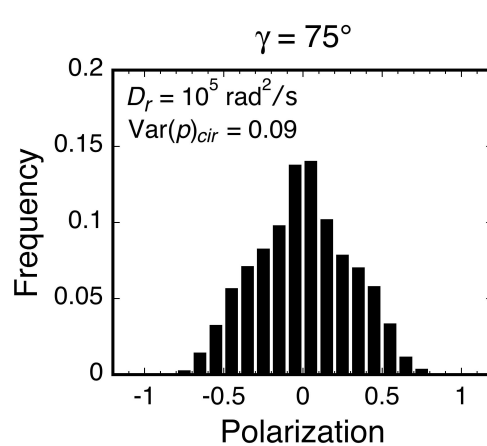

Supplement: supp [file elife-28716-supp-v1.zip]
